# Supplementary material
Source: Springer Nature journal article supplement (https://www.springermedizin.de/resource/supplementary/11689_2014_91_MOESM3_ESM.pdf/9673224)

A

LR

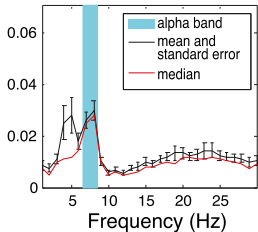

HR-no-ASD

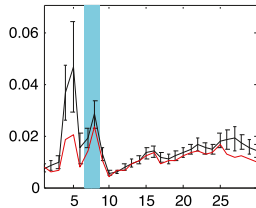

HR-ASD

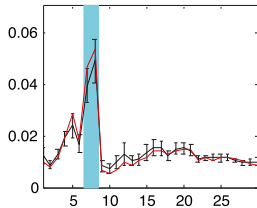

B

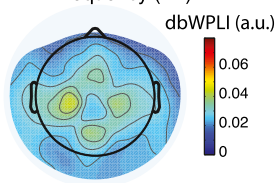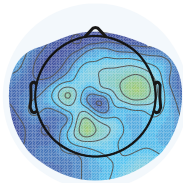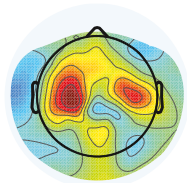

C

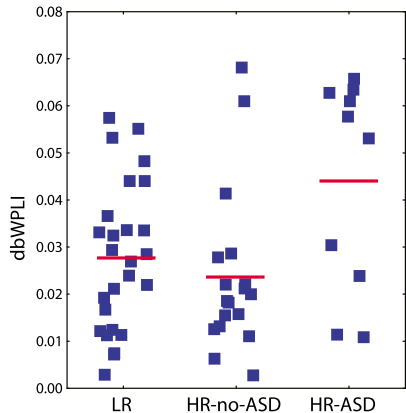

Supplement: MOESM3 [file 9673224]
